# Supplementary material for: Region-Specific Associations between Environmental Factors and Escherichia coli in Freshwater Beaches in Toronto and Niagara Region, Canada
Source: MDPI journal article supplement (doi:10.3390/ijerph182312841), 2021-12-06
Supplement: s1 [file s1]

**Table S1.** Annual environmental variable values during recreational water sampling season in Toronto, 2007-2019

| Variable                                           | Total, mean, or median value ( $\pm$ SD) |               |              |                |              |                |                |                |                |                |               |               |              |
|----------------------------------------------------|------------------------------------------|---------------|--------------|----------------|--------------|----------------|----------------|----------------|----------------|----------------|---------------|---------------|--------------|
|                                                    | 2007                                     | 2008          | 2009         | 2010           | 2011         | 2012           | 2013           | 2014           | 2015           | 2016           | 2017          | 2018          | 2019         |
| Total seasonal rainfall                            | 160                                      | 449           | 415.5        | 380.3          | 306.5        | 374.7          | 463.1          | 358.6          | 264.9          | 206.9          | 303.9         | 385.5         | 361.4        |
| Mean seasonal air temperature                      | 18.4 (4.4)                               | 17.6 (4.2)    | 17.3 (4.0)   | 19.3 (4.5)     | 19.0 (4.6)   | 20.0 (4.1)     | 18.4 (4.3)     | 17.6 (3.9)     | 18.1 (3.9)     | 19.5 (4.9)     | 17.7 (4)      | 19.8 (4.5)    | 18.1 (4.7)   |
| Mean seasonal solar radiation (Kortright station)  | NA                                       | 960.3 (203.2) | 1038 (197.6) | 1049.3 (238.3) | 1045 (243.6) | 1071.7 (209.6) | 1047.1 (234.9) | 1030.9 (202.3) | 1019.3 (228.8) | 1097.7 (159.5) | 993.1 (288.4) | 988.3 (198.9) | 996 (239.4)  |
| Mean seasonal water level                          | 74.92 (0.14)                             | 75.19 (0.1)   | 75.15 (0.07) | 74.88 (0.1)    | 75.18 (0.17) | 74.82 (0.12)   | 75.04 (0.11)   | 75.12 (0.09)   | 75.05 (0.16)   | 74.99 (0.1)    | 75.7 (0.18)   | 75.14 (0.15)  | 75.76 (0.17) |
| Mean Humber River discharge (m <sup>3</sup> /s)    | 3.44 (5.42)                              | 5.8 (5.7)     | 7.33 (6.33)  | 7.59 (9.35)    | 6.81 (7.73)  | 4.34 (5.62)    | 8.99 (17.85)   | 6.05 (4.9)     | 6.61 (7.55)    | 3.02 (2.27)    | 10.28 (13.77) | 4.9 (2.98)    | 6.73 (6.84)  |
| Mean Rouge River discharge (m <sup>3</sup> /s)     | 0.75 (1.32)                              | 1.88 (1.96)   | 2.1 (2.24)   | 2.45 (3.37)    | 2.16 (2.49)  | 1.67 (2.22)    | 2.38 (2.95)    | 2.15 (2.26)    | 2.16 (3.62)    | 0.95 (0.79)    | 3.41 (5)      | 1.96 (2.06)   | 1.81 (1.79)  |
| Mean Etobicoke Creek discharge (m <sup>3</sup> /s) | 1.47 (3.64)                              | 3.54 (6.44)   | 3.14 (4.45)  | 3.39 (5.78)    | 2.74 (4.2)   | 1.84 (2.97)    | 3.71 (7.92)    | 2.14 (3.01)    | 2.77 (4.94)    | 1.24 (2.27)    | 3.5 (7.25)    | 2.08 (2.41)   | 2.57 (3.27)  |
| Mean seasonal count of waterfowl                   | NA                                       | 48 (53.7)     | 42 (47.9)    | 48 (66.4)      | 40 (47)      | 19 (23.2)      | 22 (31.2)      | 28 (41.9)      | 19 (26.2)      | 27 (30)        | 17 (46.9)     | 11 (21.9)     | 10 (25.6)    |

**Table S2.** Annual environmental variable values during recreational water sampling season in Niagara Region, 2011-2019

| Variable                                         | Total, mean, or median value ( $\pm$ SD) |             |             |             |             |             |             |             |             |
|--------------------------------------------------|------------------------------------------|-------------|-------------|-------------|-------------|-------------|-------------|-------------|-------------|
|                                                  | 2011                                     | 2012        | 2013        | 2014        | 2015        | 2016        | 2017        | 2018        | 2019        |
| Total rainfall (mm)                              | 339.7                                    | 187.0       | 476.5       | 345.8       | 253.3       | 161.2       | 381.2       | 402.4       | 372.3       |
| Mean air temperature ( $^{\circ}$ C)             | 21.3 (3.5)                               | 22.1 (3.4)  | 20.3 (3.9)  | 20.0 (3.4)  | 19.4 (4.0)  | 22.0 (3.7)  | 20.3 (2.9)  | 22.0 (3.4)  | 20.2 (3.6)  |
| Mean UV radiation                                | 6.87 (1.91)                              | 6.98 (1.73) | 6.40 (1.84) | 6.49 (1.53) | 6.62 (1.62) | 6.88 (1.81) | 6.41 (1.79) | 6.66 (1.90) | 6.87 (1.91) |
| Median turbidity (NTU)                           | 5.2 (8.4)                                | 4.3 (7.4)   | 5.0 (6.4)   | 5.7 (9.0)   | 4.0 (5.2)   | 4.4 (6.4)   | 4.8 (8.4)   | 3.0 (4.2)   | 6.5 (12.1)  |
| Mean Niagara River discharge (m <sup>3</sup> /s) | 6320 (306)                               | 5547 (276)  | 5752 (256)  | 6116 (222)  | 6551 (415)  | 6567 (297)  | 7166 (270)  | 7168 (285)  | 7850 (272)  |
| Mean Welland Canal discharge (m <sup>3</sup> /s) | 122 (32.4)                               | 231 (34.7)  | 175 (48.1)  | 182 (60.3)  | 232 (39.0)  | 233 (39.9)  | 137 (35.1)  | 160 (25.5)  | NA          |
| Mean Port Colborne Buoy Wave Height (m)          | 0.4 (0.54)                               | 0.3 (0.40)  | 0.4 (0.54)  | 0.3 (0.49)  | 0.5 (0.58)  | 0.3 (0.45)  | 0.2 (0.43)  | 0.4 (0.50)  | 0.4 (0.48)  |
| Mean Grimsby Buoy Wave Height (m)                | 0.3 (0.36)                               | 0.2 (0.27)  | 0.2 (0.27)  | 0.3 (0.36)  | 0.2 (0.36)  | 0.2 (0.34)  | 0.1 (0.25)  | 0.3 (0.36)  | 0.3 (0.37)  |
